# Supplementary material for: DNA methylation regulation of CYP450-lipid metabolism by high-altitude hypoxia: linking neuroinflammation to cognitive impairment
Source: Research Square preprint supplement (doi:10.21203/rs.3.rs-7565540/v1), 2025-09-19

Original images of western blot of Figure 6B


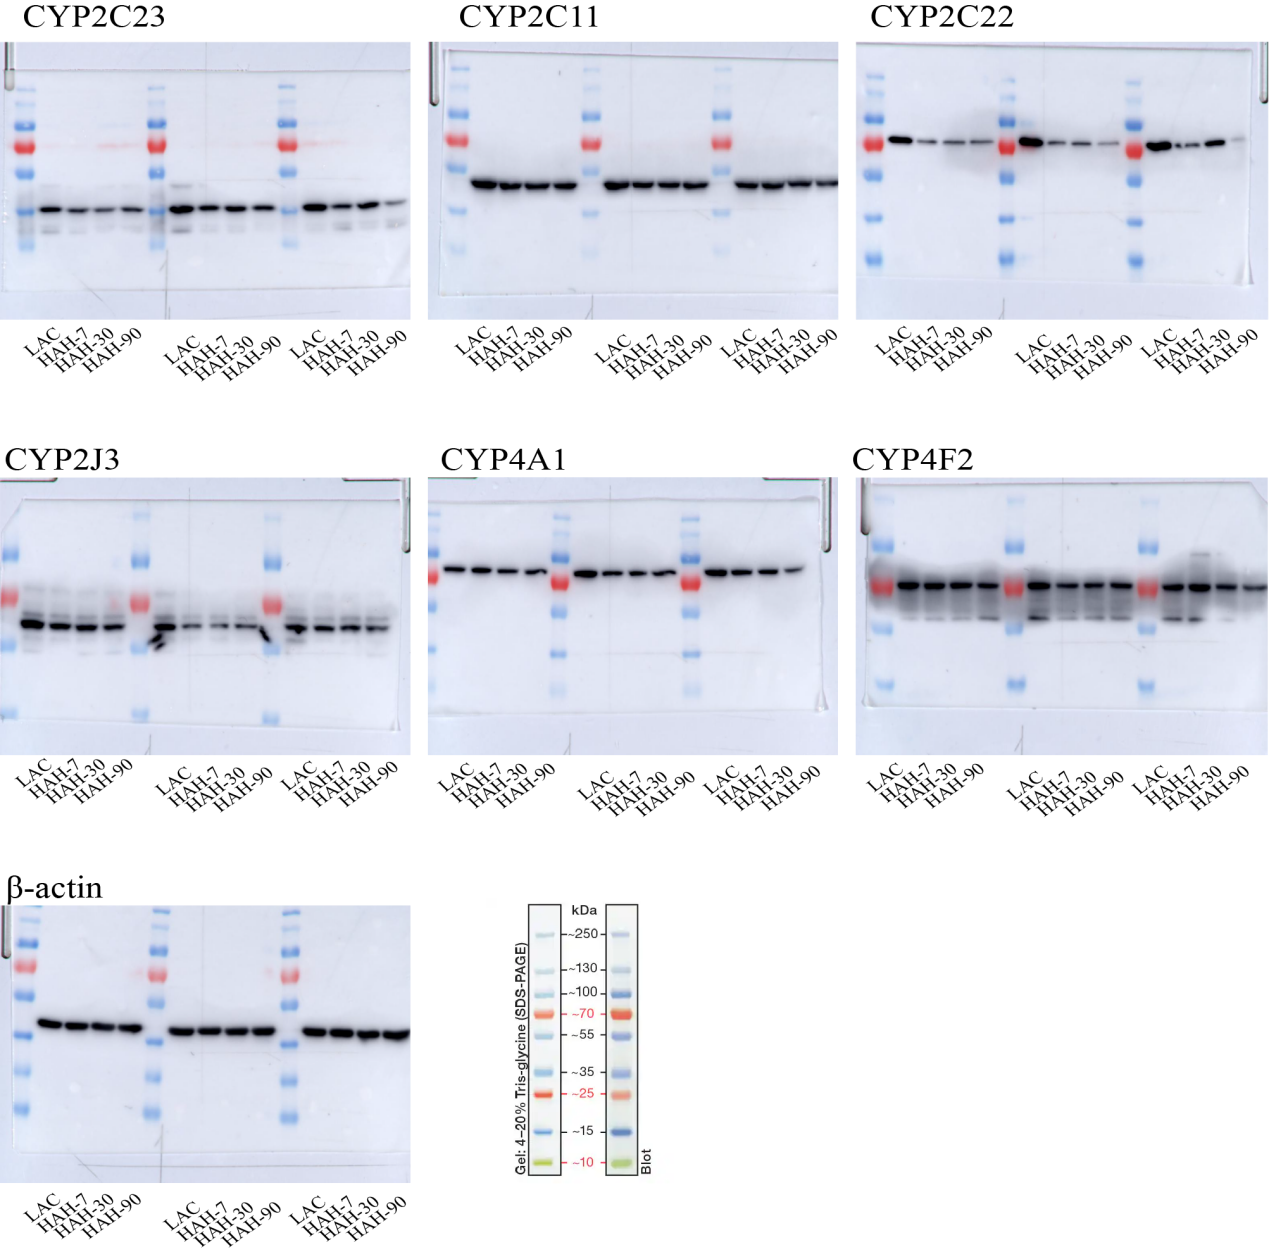


Original images of western blot of Figure 7F


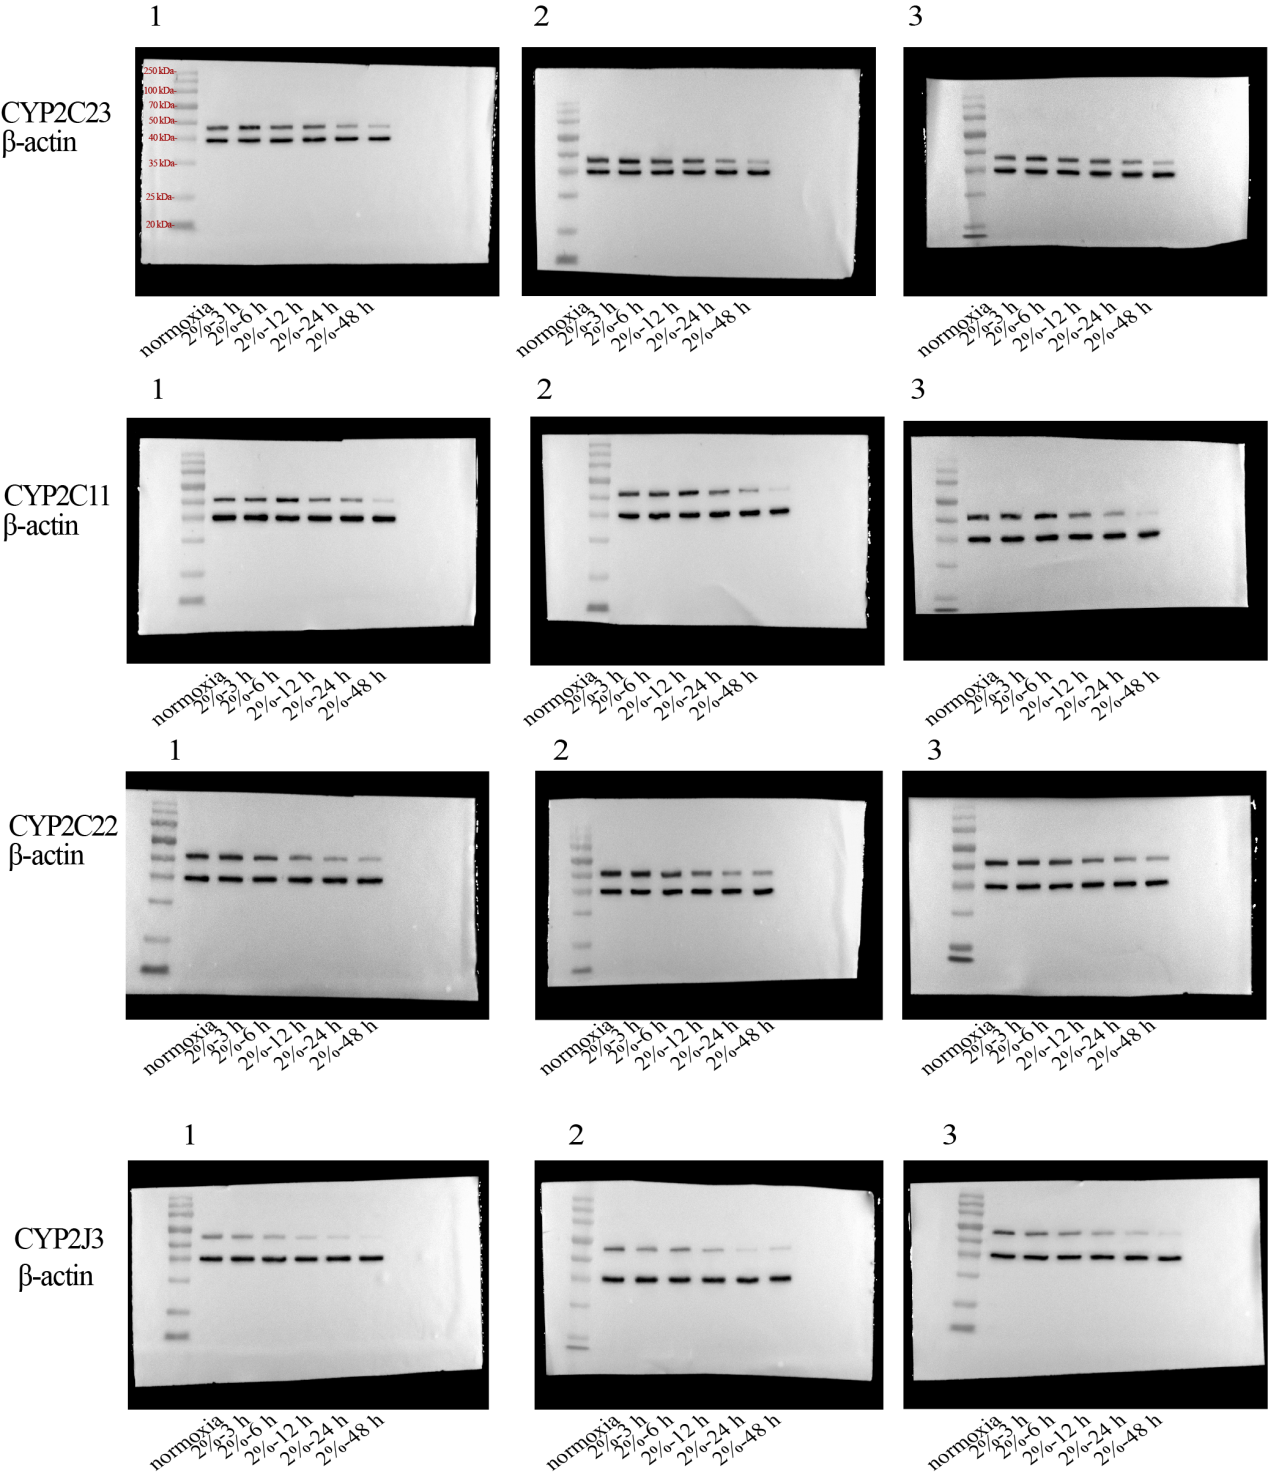


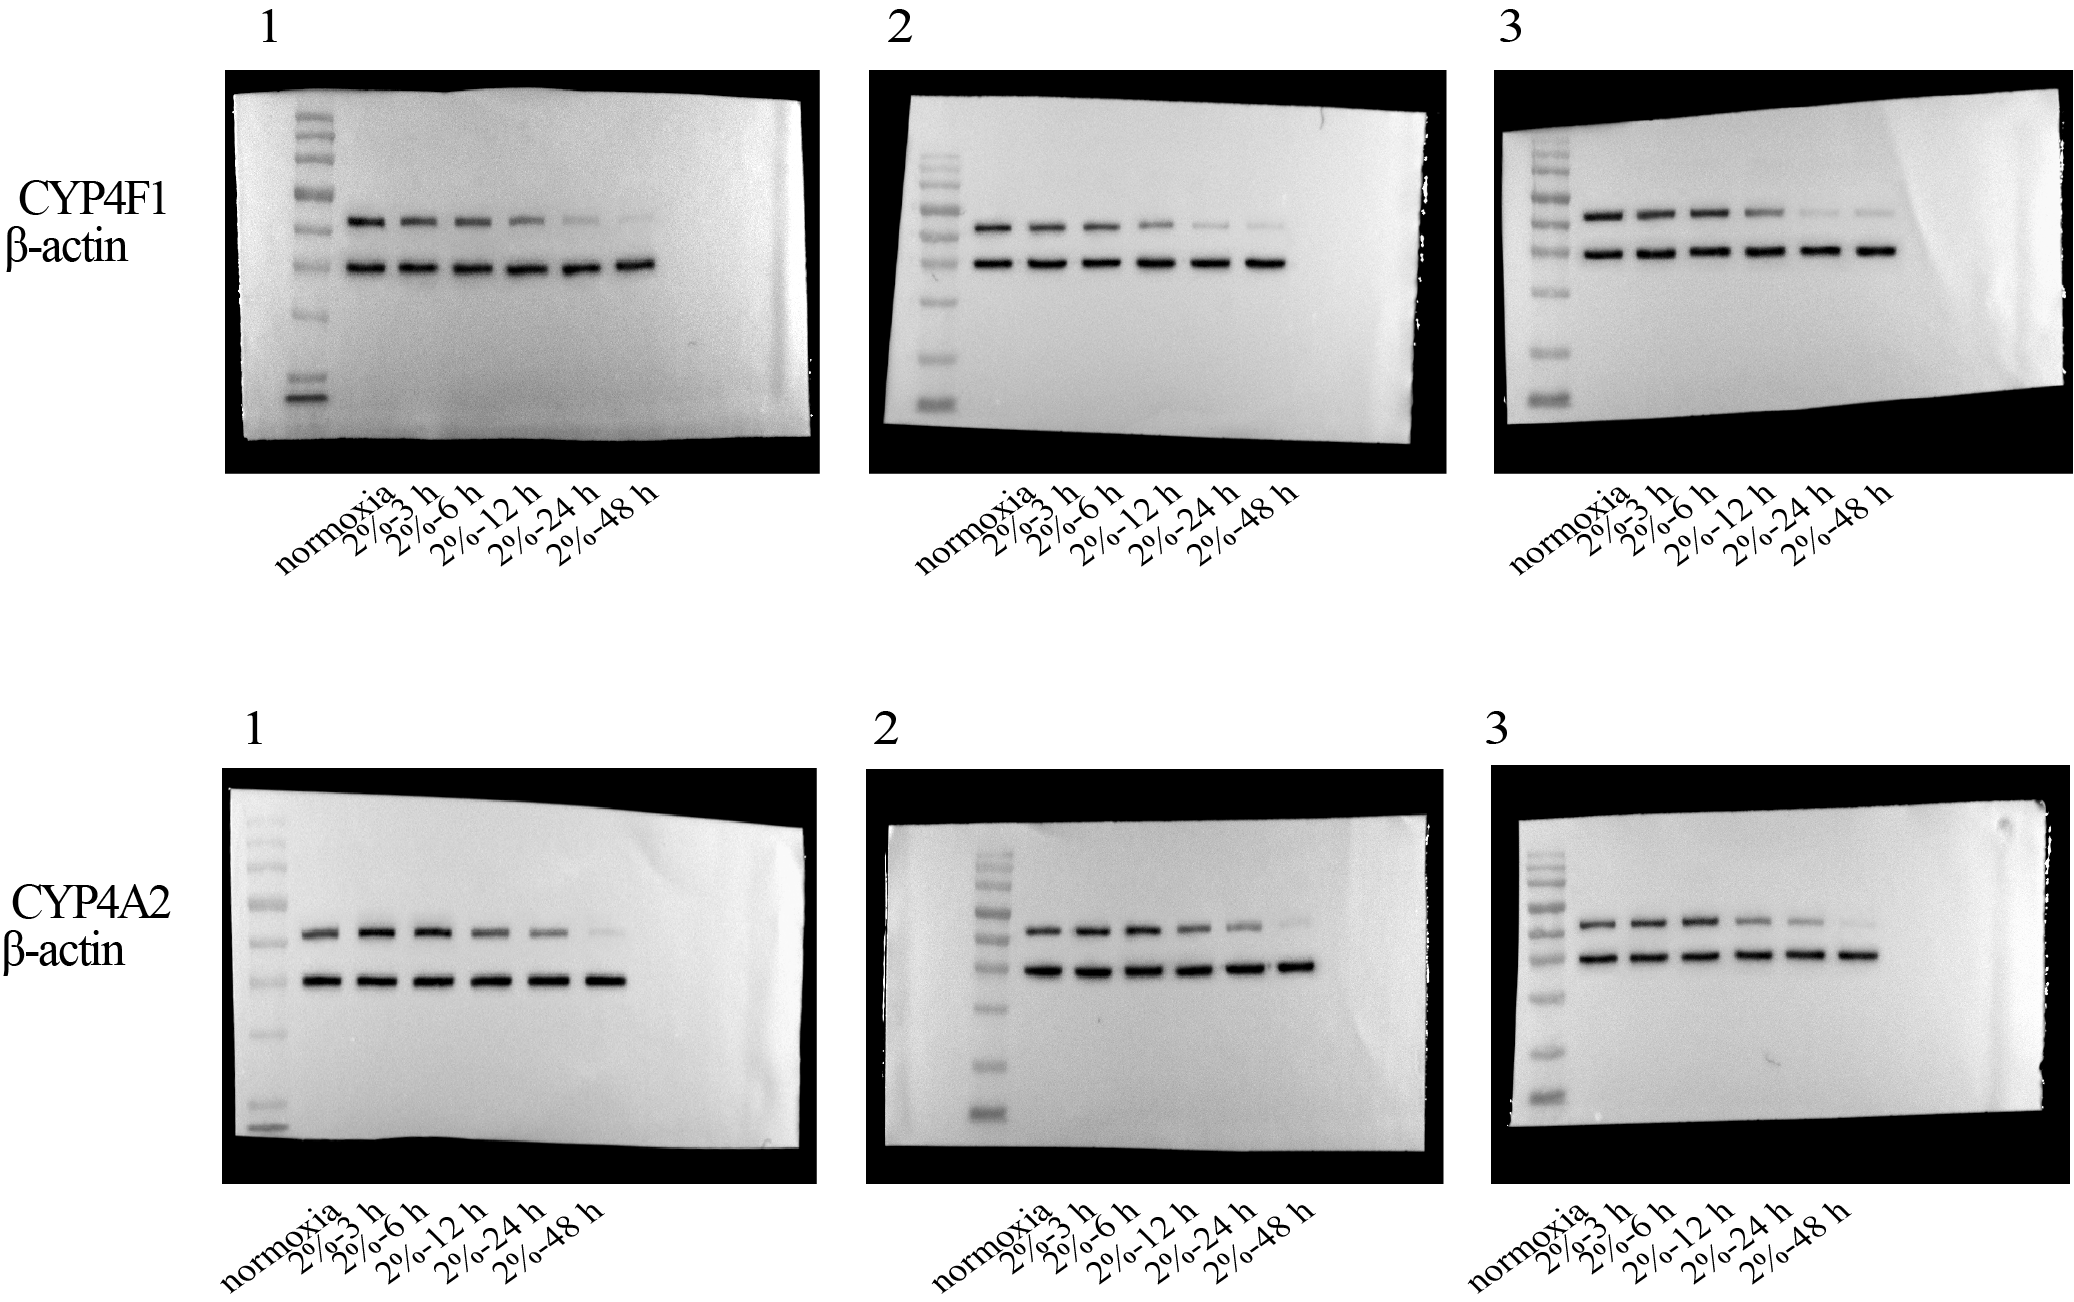


Original images of western blot of Figure 8C


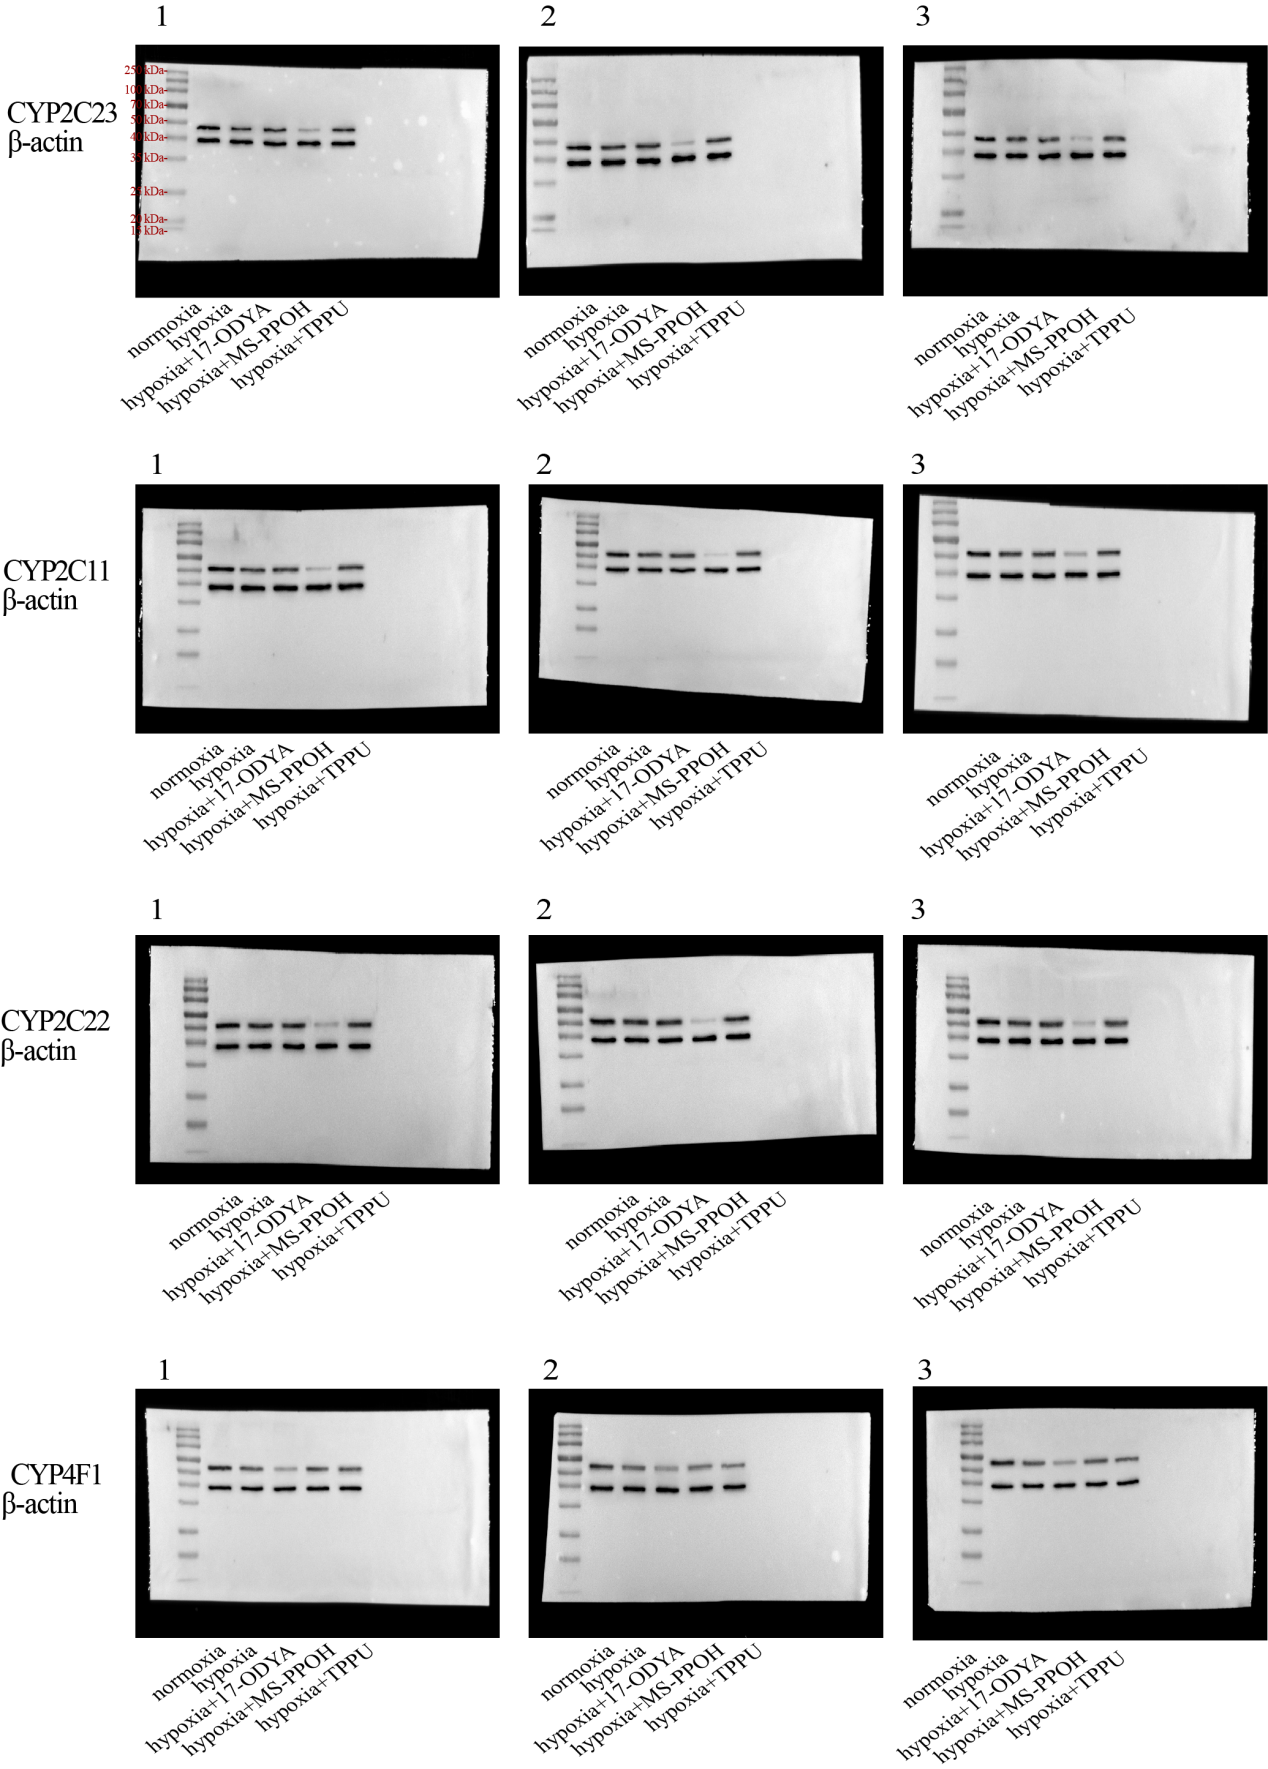


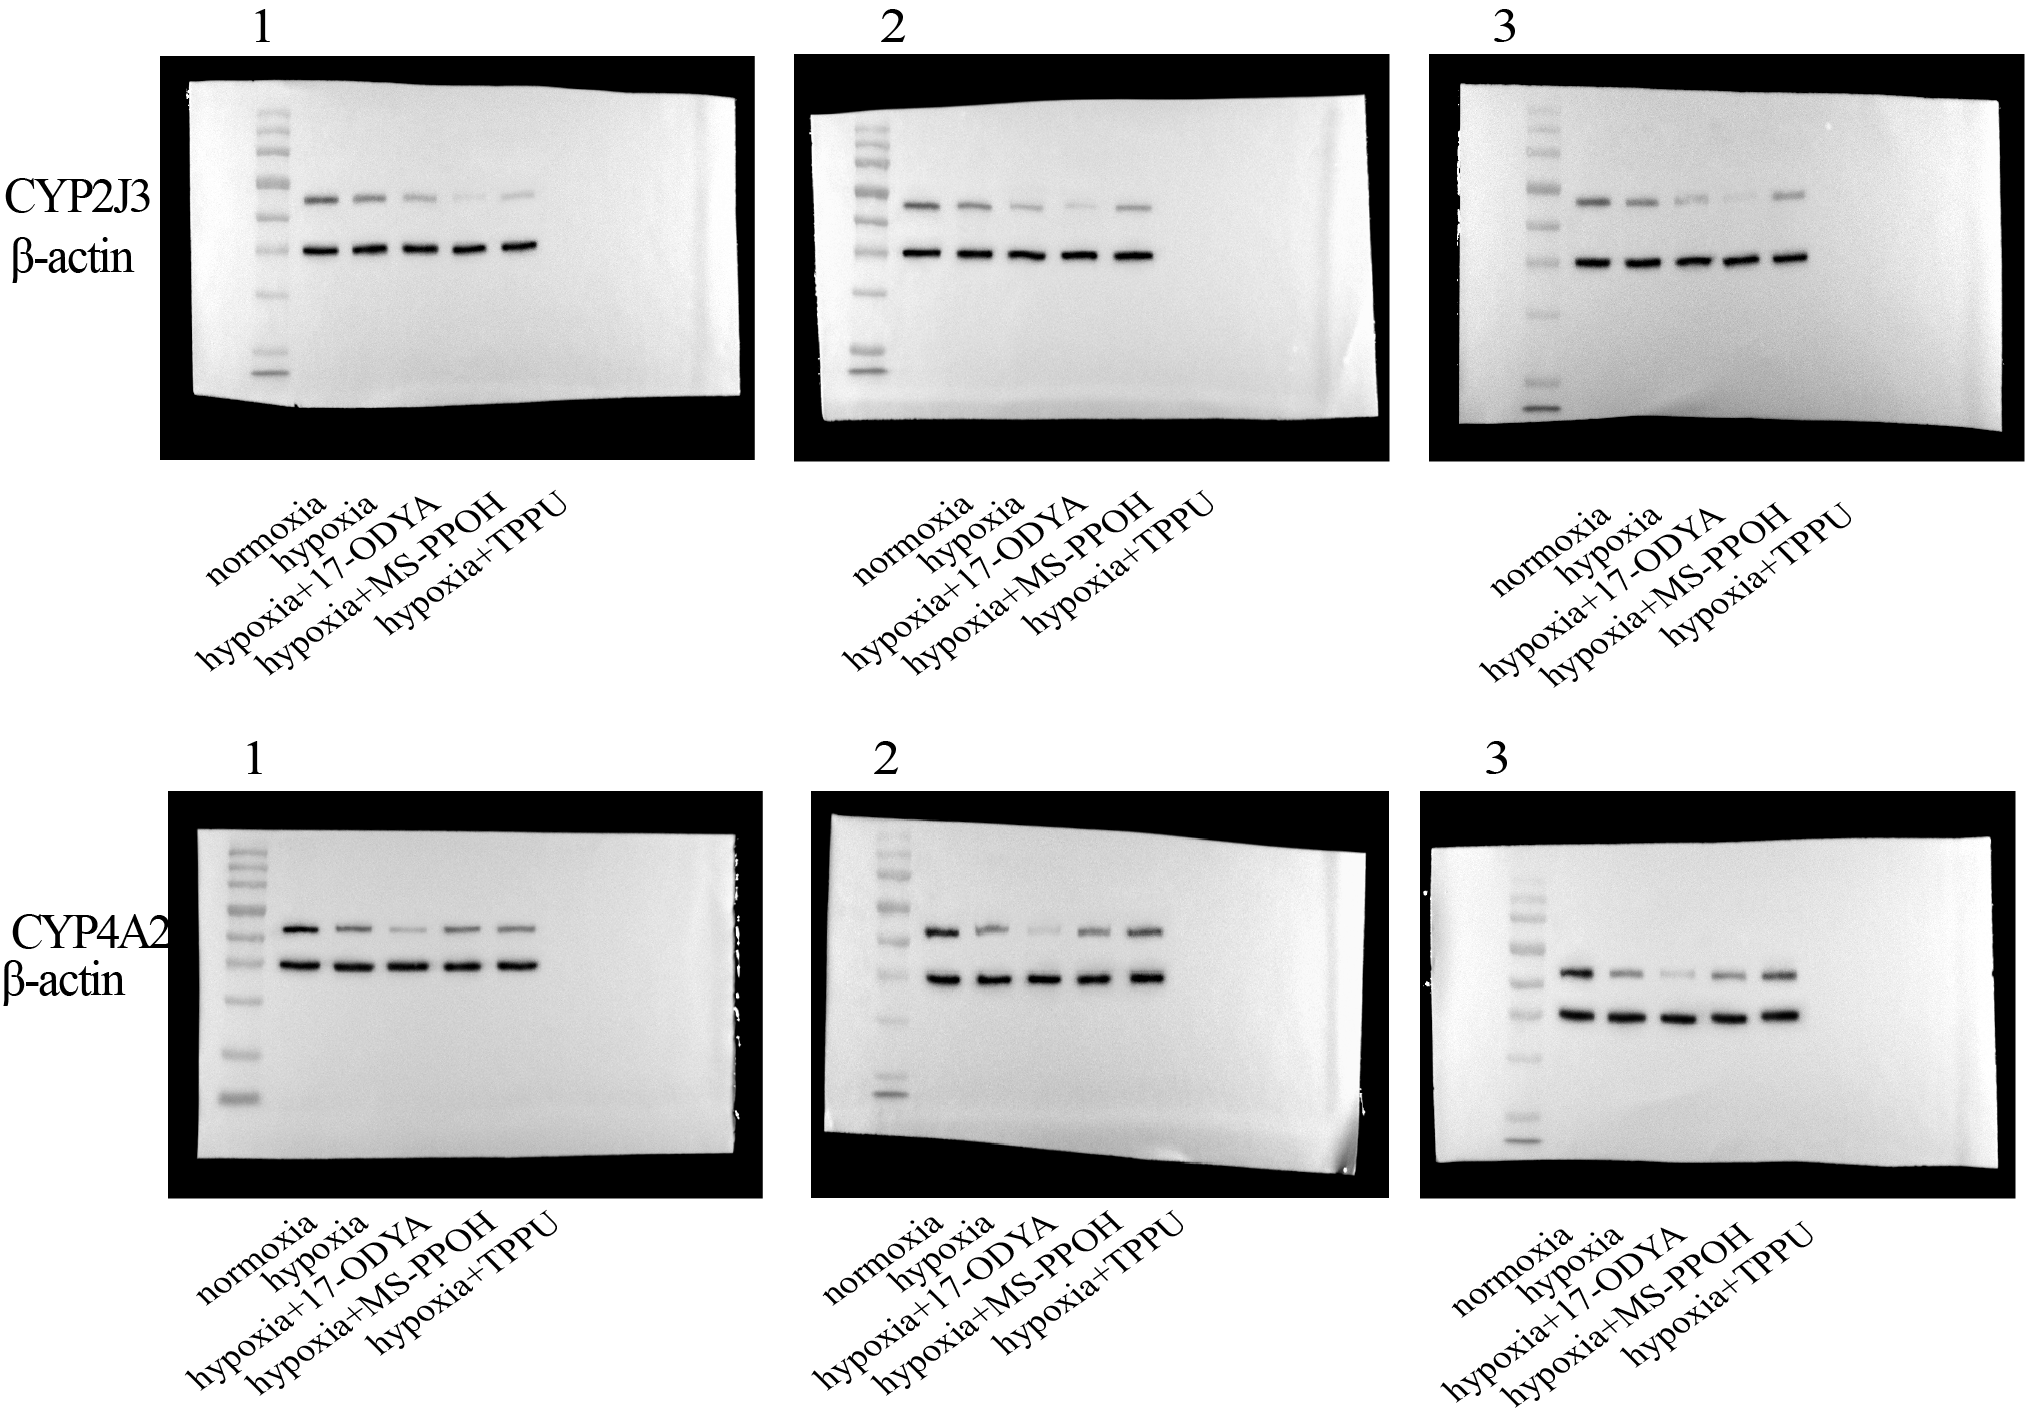


Original images of western blot of Figure 10B


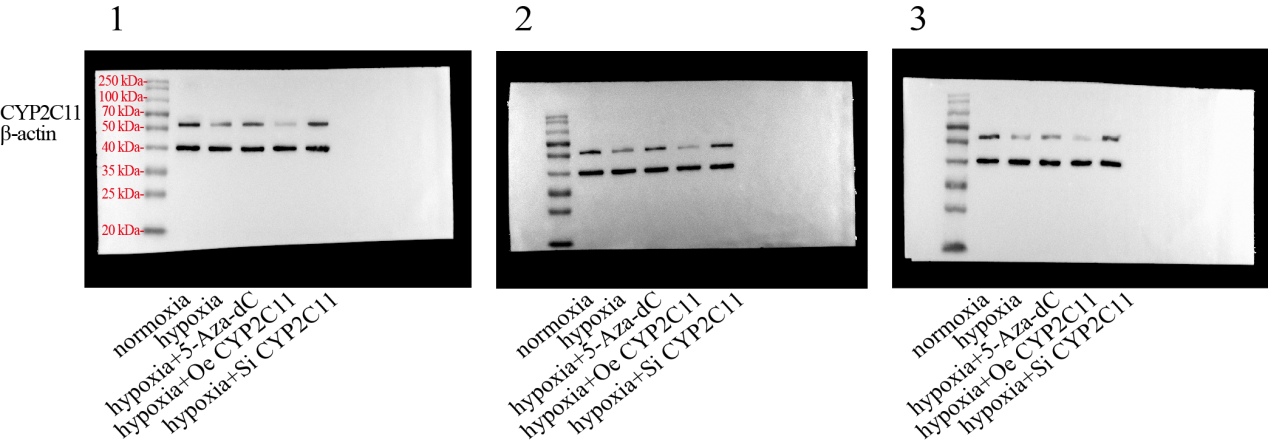

Supplement: Supplementary file 1 [file e62b716e2358c6351198e56b.docx]
